# Supplementary material
Source: publisher figshare collection journal article supplement (https://gsajournals.figshare.com/articles/dataset/_/10565573)

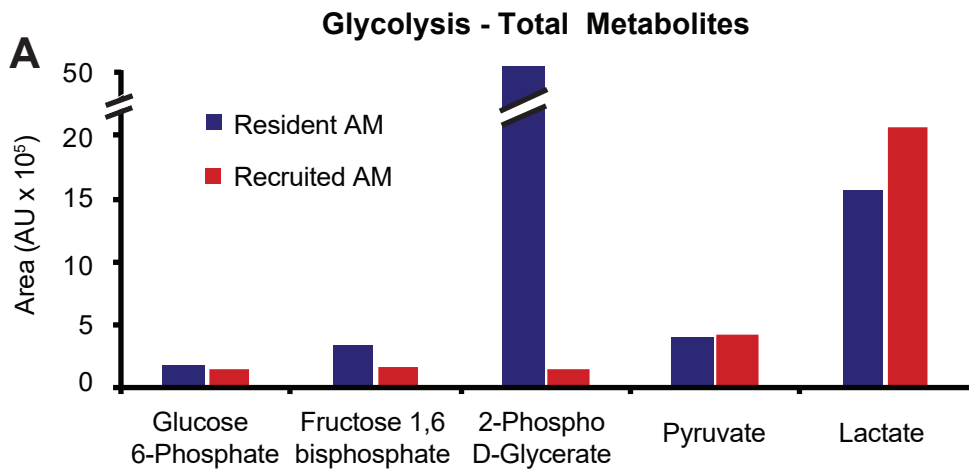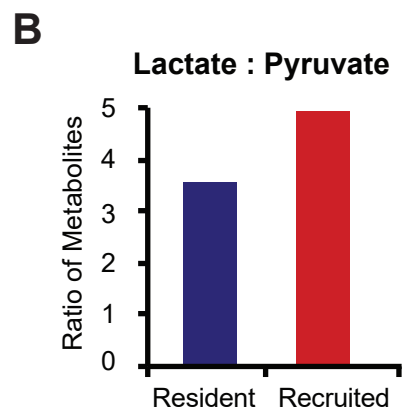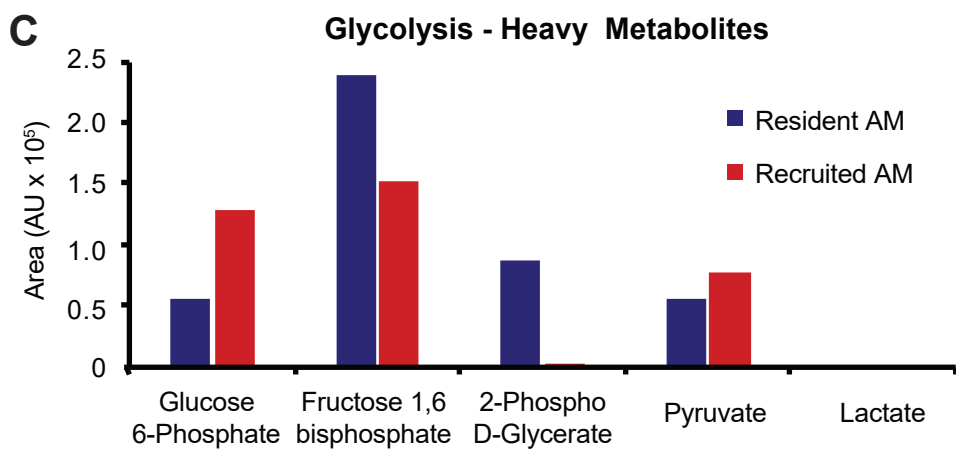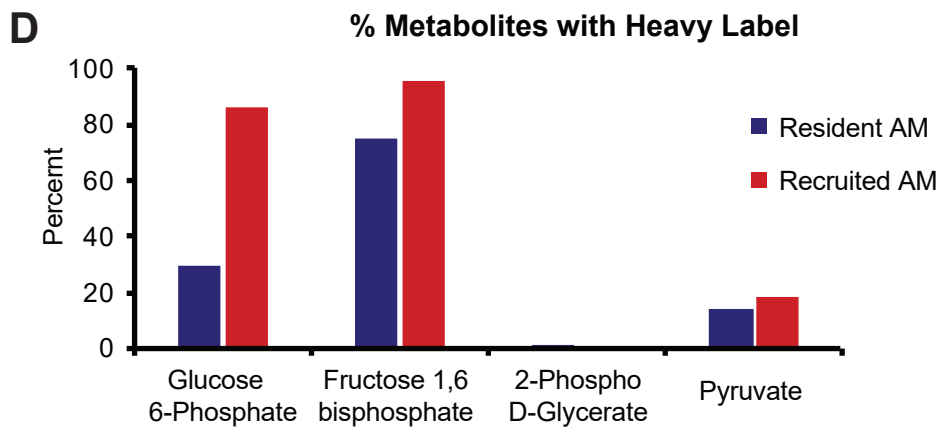

Supplement: Supplementary file 1 [file 1]

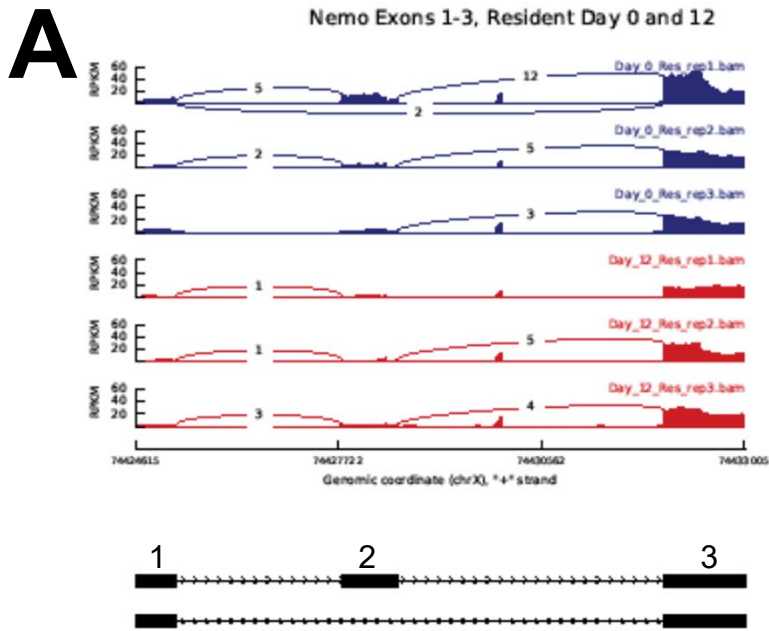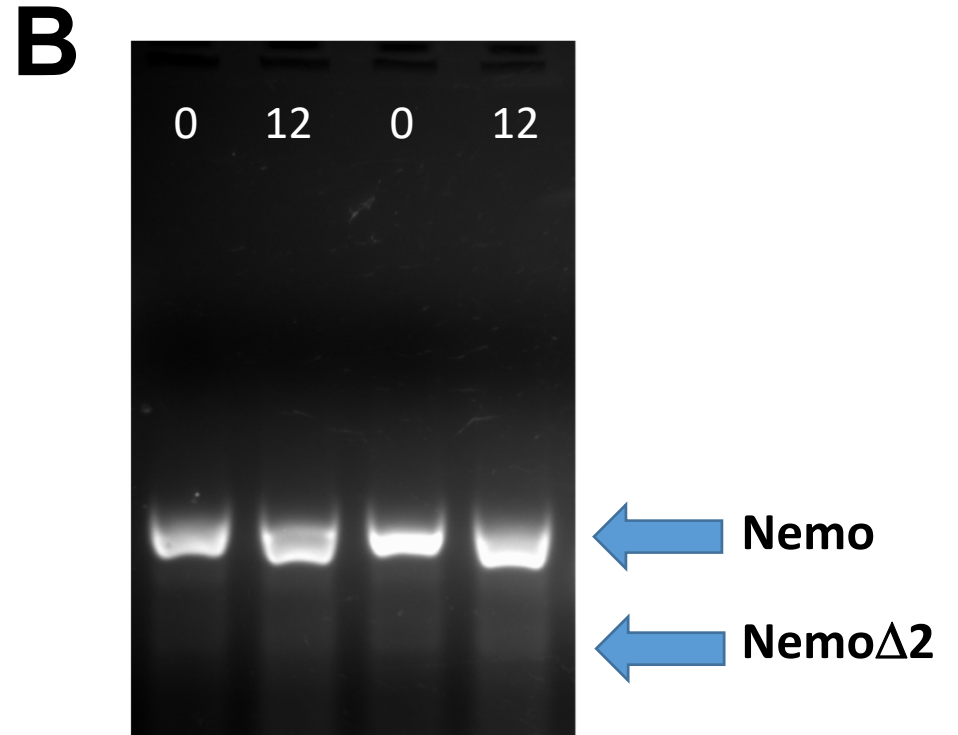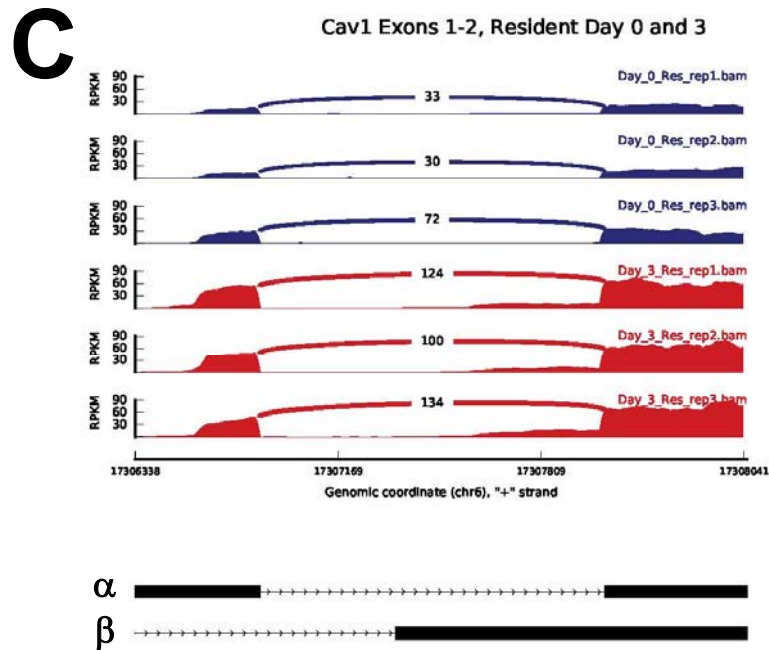

Supplement: Supplementary file 2 [file 1]

**A**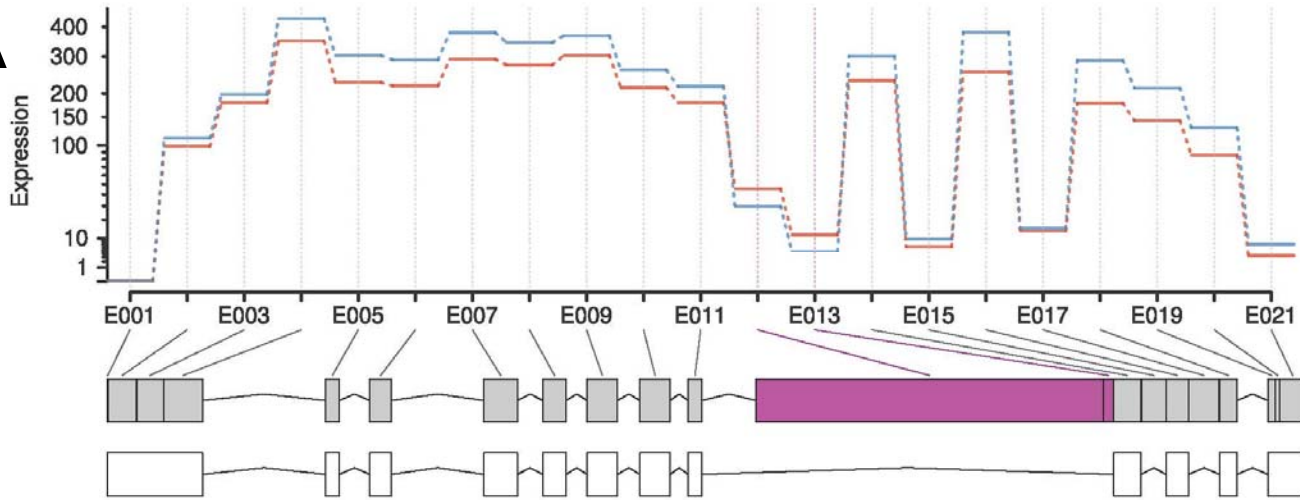**B**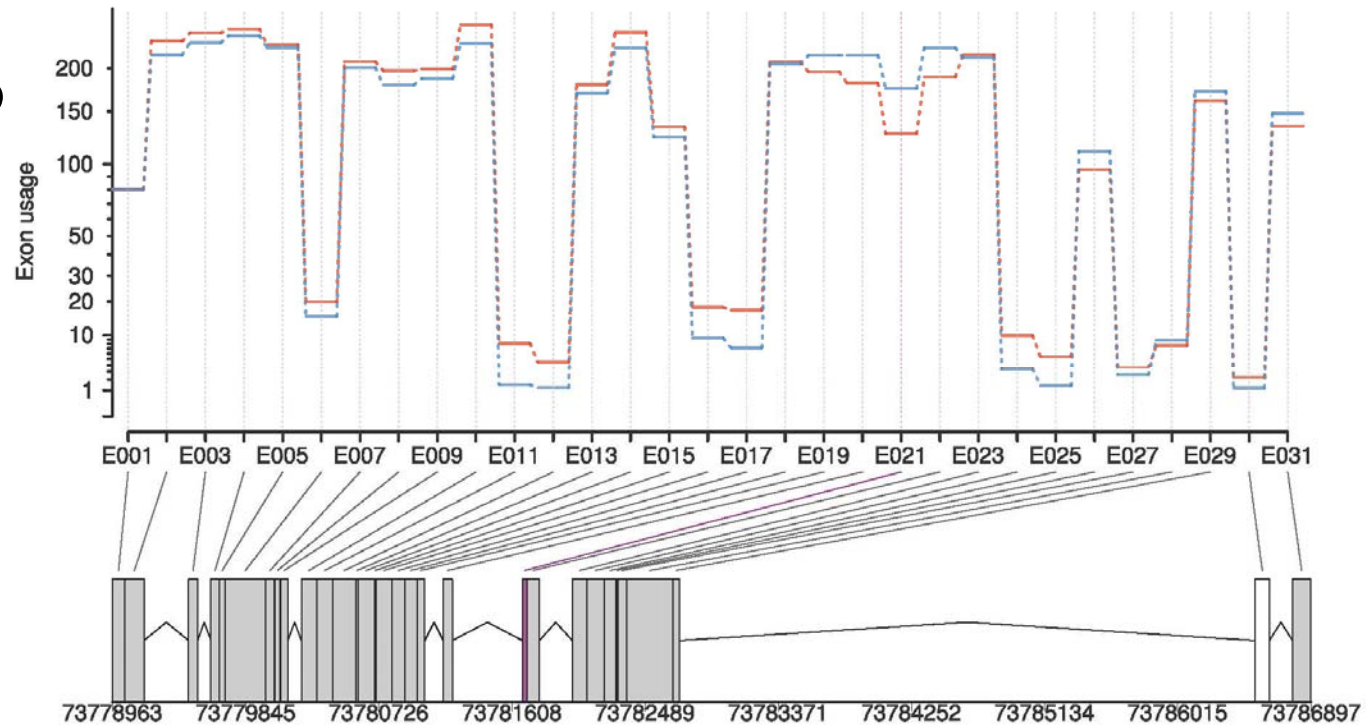

Supplement: Supplementary file 3 [file 1]

**DEXseq**

**MISO**

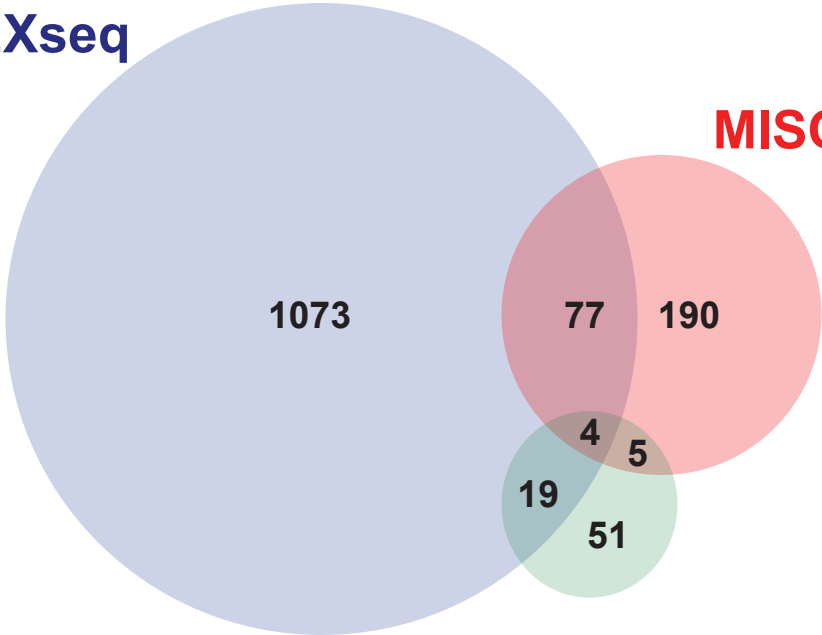

**CUFFDIFF**

Supplement: Supplementary file 4 [file 1]

***in vivo***

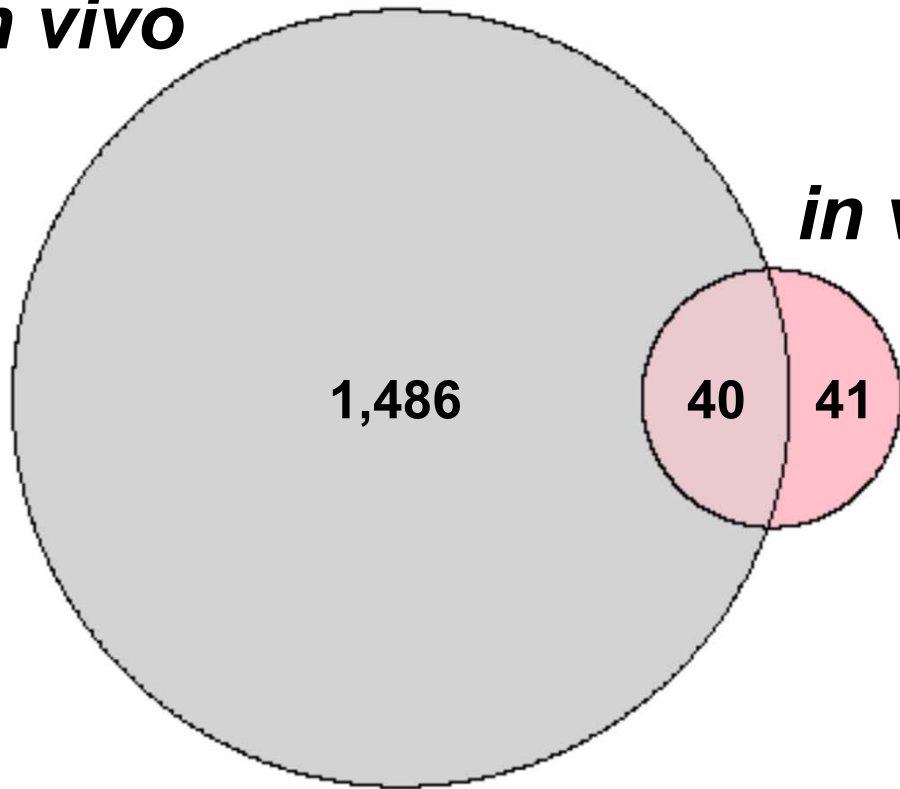

**1,486**

**40**

**41**

***in vitro***

Supplement: Supplementary file 5 [file 1]
